# Supplementary material for: Electrolyte and acid-base disorders in cancer patients and its impact on clinical outcomes: evidence from a real-world study in China
Source: PubMed Central journal article supplement (PMC7067195; doi:10.1080/0886022x.2020.1735417), 2020-03-05
Supplement: IRNF_A_1735417_SM0488.pdf [file IRNF_A_1735417_SM0488.pdf]

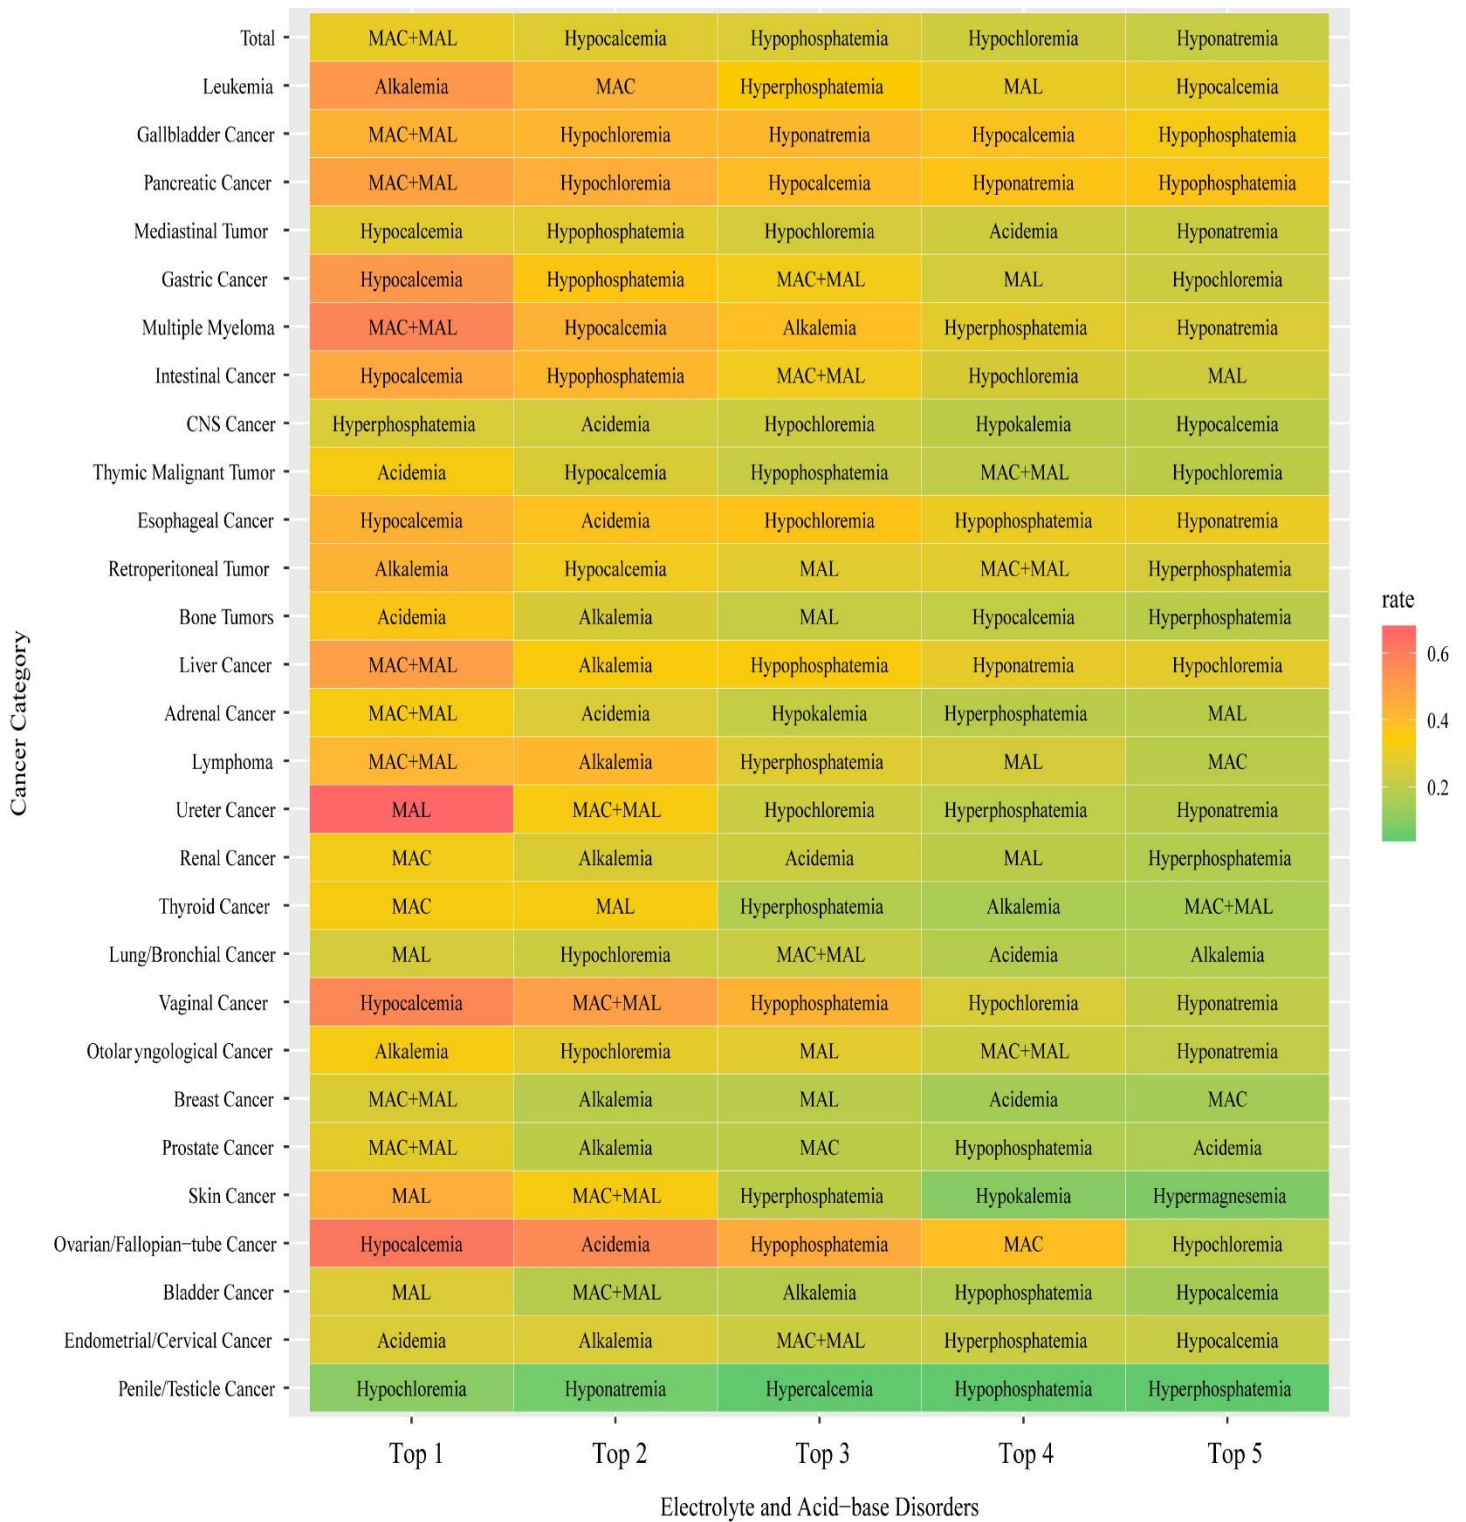

**Supplementary Figure 1.** The top 5 EAD for different cancer categories. *MAC*: metabolic acidosis; *MAL*: metabolic alkalosis.
