# Supplementary material for: Electrolyte and acid-base disorders in cancer patients and its impact on clinical outcomes: evidence from a real-world study in China
Source: PubMed Central journal article supplement (PMC7067195; doi:10.1080/0886022x.2020.1735417), 2020-03-05
Supplement: IRNF_A_1735417_SM0548.pdf [file IRNF_A_1735417_SM0548.pdf]

**Supplementary Table 1.** The severity classification of electrolyte and acid-base disorders

| EAD               | Grade 1          | Grade 2          | Grade 3          | Grade 4      |
|-------------------|------------------|------------------|------------------|--------------|
| Hyponatremia      | 130~137 mmol/L   | 125~129 mmol/L   | 120~124 mmol/L   | <120 mmol/L  |
| Hypernatremia     | 147~149 mmol/L   | 150~154 mmol/L   | 155~160 mmol/L   | >160 mmol/L  |
| Hypokalemia       | 3.0~3.5 mmol/L   | —                | 2.5~2.9 mmol/L   | <2.5 mmol/L  |
| Hyperkalemia      | 4.5~5.4 mmol/L   | 5.5~5.9 mmol/L   | 6.0~7.0 mmol/L   | >7.0 mmol/L  |
| Hypochloremia     | 95~99 mmol/L     | 90~94 mmol/L     | 85~89 mmol/L     | <84 mmol/L   |
| Hyperchloremia    | 110~114 mmol/L   | 115~119 mmol/L   | 120~125 mmol/L   | >125 mmol/L  |
| Hypocalcemia      | 2.0~2.15 mmol/L  | 1.75~1.9 mmol/L  | 1.5~1.74 mmol/L  | <1.5 mmol/L  |
| Hypercalcemia     | 2.55~2.9 mmol/L  | 3.0~3.1 mmol/L   | 3.2~3.4 mmol/L   | >3.4 mmol/L  |
| Hypomagnesemia    | 0.5~0.69 mmol/L  | 0.5~0.4 mmol/L   | 0.4~0.3 mmol/L   | <0.3 mmol/L  |
| Hypermagnesemia   | 1.04~1.23 mmol/L | —                | 1.23~3.30 mmol/L | >3.30 mmol/L |
| Hypophosphatemia  | 0.8~0.9 mmol/L   | 0.6~0.79 mmol/L  | 0.4~0.59 mmol/L  | <0.4 mmol/L  |
| Hyperphosphatemia | 1.34~1.49 mmol/L | 1.50~1.59 mmol/L | 1.60~1.80 mmol/L | >1.80 mmol/L |
| Acidemia          | 7.3~7.35         | —                | <7.3             | —            |
| Alkalemia         | 7.45~7.5         | —                | >7.5             | —            |

EAD: electrolyte and acid-base disorders.
